# Supplementary material for: Pneumococcal genetic variability in age-dependent bacterial carriage
Source: eLife journal article supplement (doi:10.7554/elife.69244), 2022-07-26
Supplement: supp [file elife-69244-supp-v1.zip]

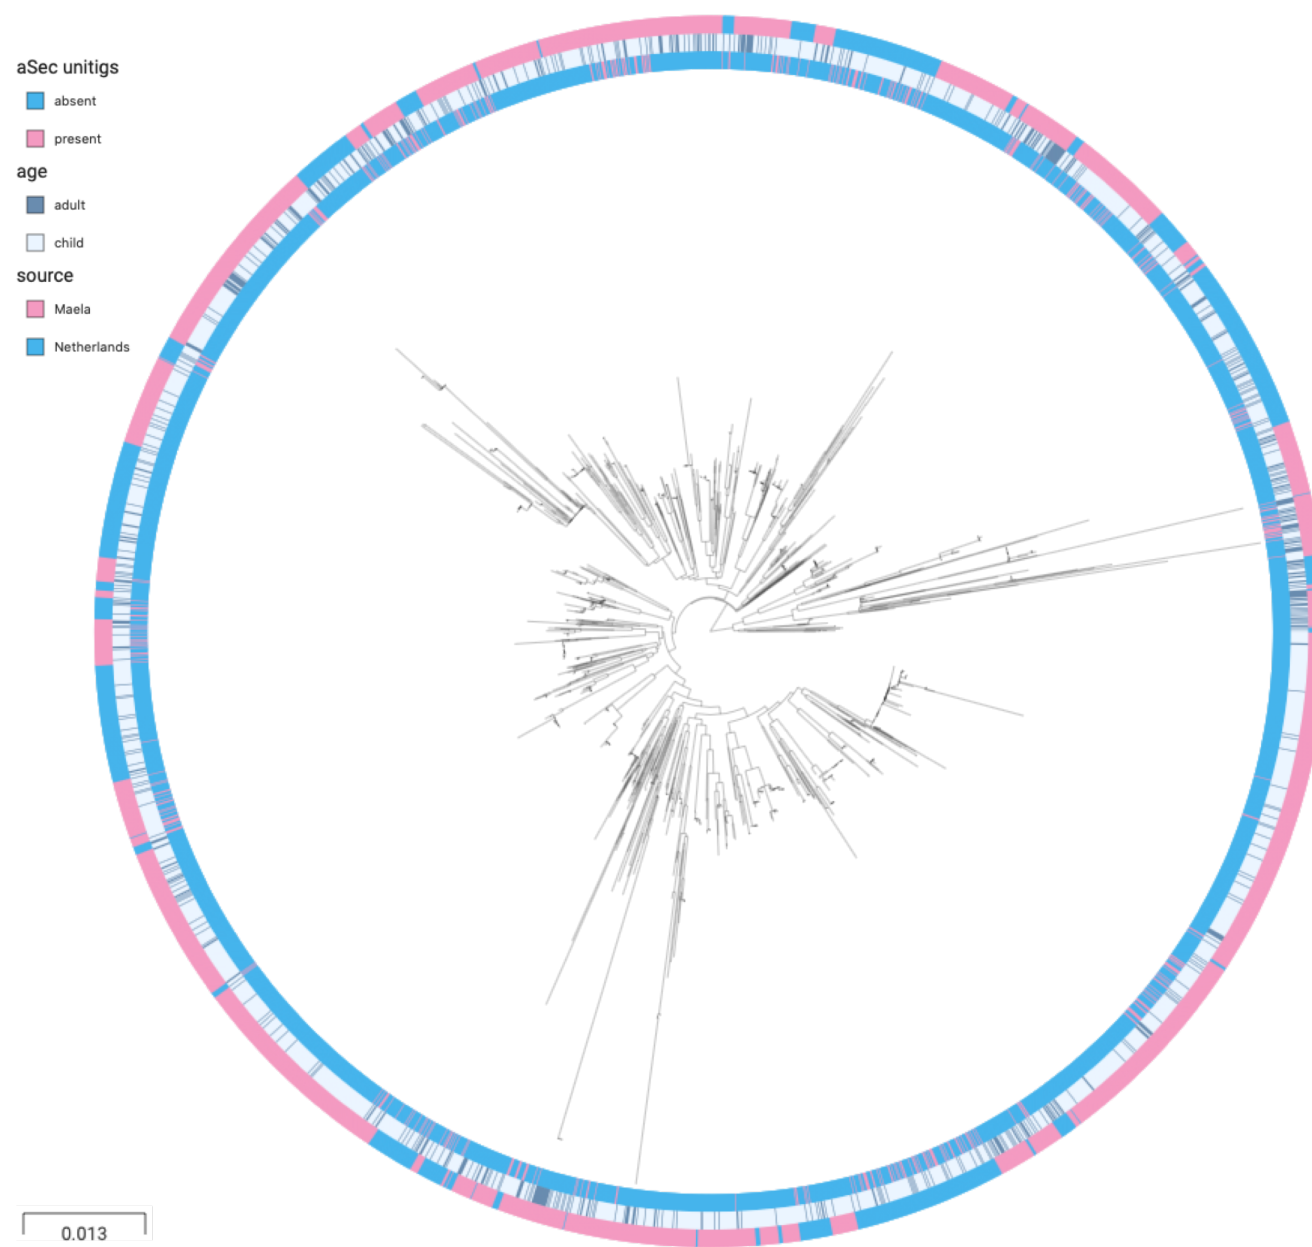

**Figure 2-figure supplement 1** - Phylogenetic tree of carriage samples from both cohorts. The rings show metadata for the samples. Depicted from inside to outside, these are: presence or absence of the unitig upstream to the aSec gene, age (adult or child) and source (Maela or Netherlands). Scale bar: 0.013 substitutions per site.
