# Supplementary material for: Pneumococcal genetic variability in age-dependent bacterial carriage
Source: eLife journal article supplement (doi:10.7554/elife.69244), 2022-07-26
Supplement: supp [file elife-69244-supp-v1.zip]

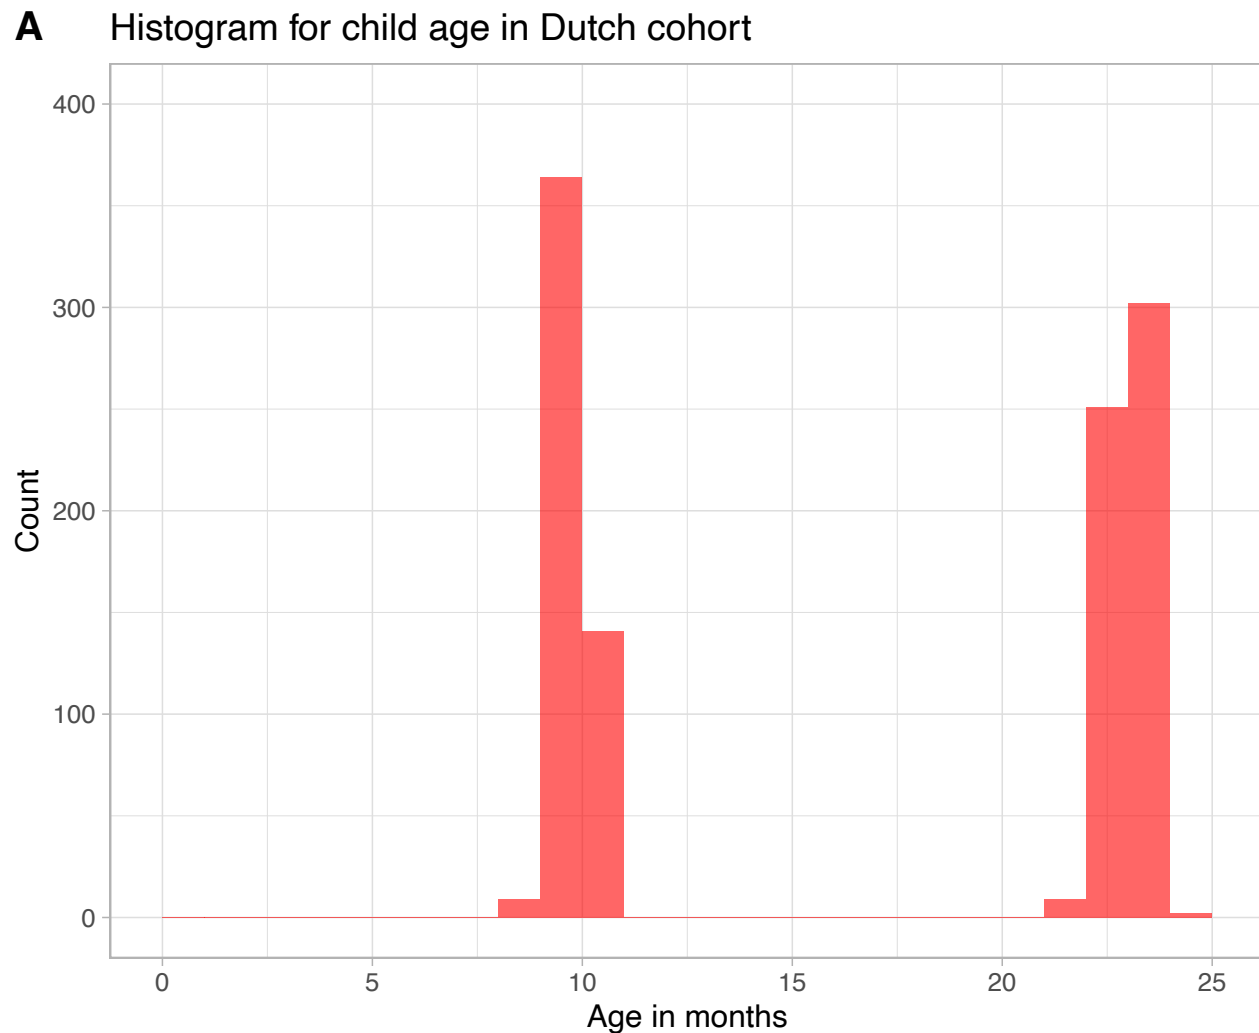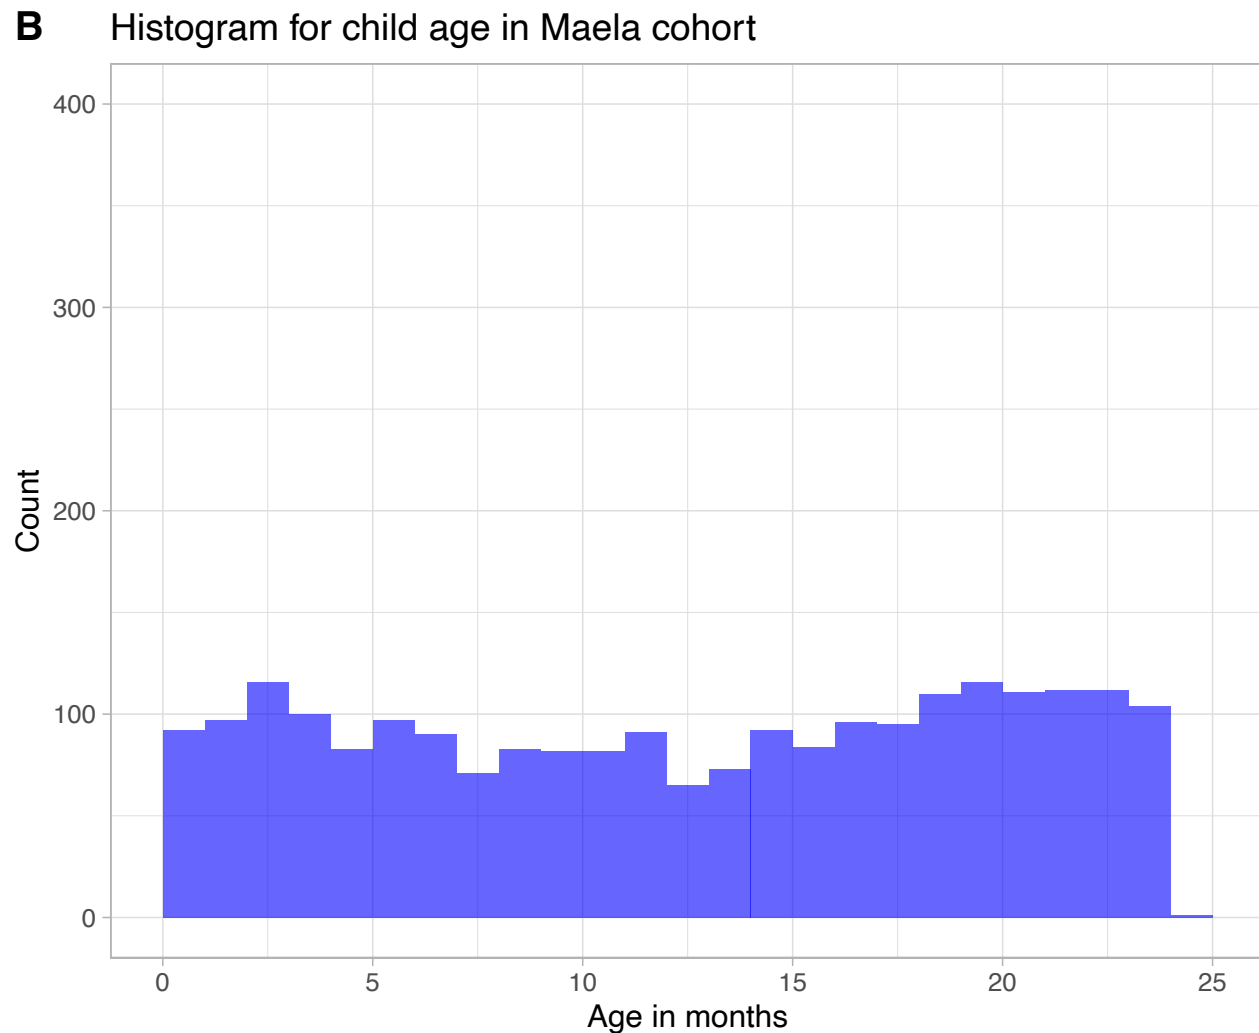

**Figure 1-figure supplement 1** - Histogram for child age (in months) in A. Dutch cohort (red bars) and B. Maela cohort (blue bars). Due to the differences in sampling strategies in the studies from which the samples were obtained, children in the Dutch cohort were sampled at ages 9 – 11 months and 22 – 24 months, while in the Maela cohort children were sampled in the age range 1 – 24 months.
