# Supplementary material for: Pneumococcal genetic variability in age-dependent bacterial carriage
Source: eLife. 2022 Jul 26;11:e69244. doi: 10.7554/eLife.69244 (PMC9395192; doi:10.7554/eLife.69244)
Supplement: Supplementary file 1. [file elife-69244-supp1.xlsx]

## Sheet: Sheet1
serotype	adult	child	missing	total
19A	30	187	8	225
11A	17	91	3	111
6C	8	84	5	97
23B	13	68	3	84
10A	17	50	0	67
16F	7	44	3	54
21	5	46	0	51
15B	2	44	3	49
15C	9	38	1	48
35B	9	34	3	46
23A	8	35	1	44
35F	4	35	0	39
22F	6	29	2	37
3	16	18	3	37
6A	5	30	1	36
33F	10	24	0	34
unknown	8	22	1	31
19F	5	22	4	31
non-typable	8	19	0	27
6B	1	25	0	26
17F	3	17	0	20
38	10	9	0	19
9N	5	10	1	16
8	4	8	1	13
23F	1	10	1	12
15A	2	8	1	11
7F	4	7	0	11
31	3	7	0	10
24	0	9	0	9
1	1	5	0	6
18C	3	2	0	5
14	2	2	0	4
9V	3	1	0	4
12F	1	1	1	3
23B1	0	3	0	3
42	0	3	0	3
18B	0	1	0	1
22A	0	1	0	1
37	0	1	0	1
4	0	1	0	1
5	0	1	0	1
6E(6B)	0	1	0	1
all	230	1053	46	1329
