# Supplementary material for: Pneumococcal genetic variability in age-dependent bacterial carriage
Source: eLife. 2022 Jul 26;11:e69244. doi: 10.7554/eLife.69244 (PMC9395192; doi:10.7554/eLife.69244)
Supplement: Supplementary file 3. [file elife-69244-supp3.xlsx]

## Sheet: Sheet1
serotype	child	mother	total
non-typable	308	203	511
19F	380	22	402
23F	287	20	307
6B	216	20	236
14	161	14	175
6A	128	14	142
34	85	15	100
15B	72	8	80
19A	71	6	77
6C	66	8	74
15A	50	8	58
11A	38	17	55
13	33	16	49
35C	36	12	48
10B	30	15	45
35F	33	12	45
15C	40	1	41
10A	36	3	39
33B	31	7	38
3	16	21	37
23A	30	4	34
19B	26	7	33
21	30	1	31
16F	23	6	29
18C	22	6	28
4	20	6	26
9V	18	6	24
28F	15	7	22
9N	18	4	22
17F	13	6	19
22A	16	1	17
20	11	4	15
7B	15	0	15
22F	9	5	14
23B	10	4	14
7F	9	5	14
38	12	1	13
33C	9	3	12
10F	9	2	11
32A	5	6	11
37	4	7	11
40	5	6	11
5	6	5	11
31	8	2	10
32F	3	7	10
46	4	6	10
24F	8	1	9
8	6	3	9
1	2	4	6
33D	6	0	6
18A	1	4	5
45	4	0	4
48	1	3	4
18F	0	3	3
29	2	0	2
33F	0	2	2
35B	2	0	2
12F	0	1	1
2	1	0	1
24A	1	0	1
25F	1	0	1
36	0	1	1
39	0	1	1
9L	1	0	1
all	2503	582	3085
