# Supplementary material for: Pneumococcal genetic variability in age-dependent bacterial carriage
Source: eLife. 2022 Jul 26;11:e69244. doi: 10.7554/eLife.69244 (PMC9395192; doi:10.7554/eLife.69244)
Supplement: Supplementary file 4. [file elife-69244-supp4.xlsx]

## Sheet: Sheet1
GPSC	adult	child	missing	total
4	25	146	6	177
3	32	124	4	160
7	22	109	5	136
11	12	107	3	122
36-35	21	84	0	105
29	9	84	5	98
46	7	44	3	54
75	9	33	3	45
19	6	31	2	39
12	15	19	3	37
44	5	22	4	31
24	1	26	0	27
49	4	20	0	24
109	5	18	0	23
16	6	14	1	21
38	10	9	0	19
60	4	11	0	15
146	1	13	0	14
18	2	8	3	13
99	2	11	0	13
15	4	7	0	11
197	1	9	0	10
57	3	7	0	10
76	1	9	0	10
5	0	9	0	9
6	3	6	0	9
64	2	7	0	9
10	1	7	0	8
140	2	4	1	7
31	1	5	0	6
291	2	3	0	5
81	2	3	0	5
89	0	5	0	5
17	0	4	0	4
27	0	3	0	3
48	0	3	0	3
50	2	1	0	3
83	1	2	0	3
101	0	2	0	2
119	0	2	0	2
157	0	2	0	2
32	0	1	1	2
61	0	2	0	2
72	0	2	0	2
121	0	0	1	1
123	0	1	0	1
13	0	1	0	1
156	0	1	0	1
250	0	1	0	1
315	0	1	0	1
378	0	1	0	1
47	0	1	0	1
55	1	0	0	1
589	0	0	1	1
590	0	1	0	1
8	0	1	0	1
9	0	1	0	1
97	1	0	0	1
98	1	0	0	1
all	226	1048	46	1320
