# Supplementary material for: Pneumococcal genetic variability in age-dependent bacterial carriage
Source: eLife. 2022 Jul 26;11:e69244. doi: 10.7554/eLife.69244 (PMC9395192; doi:10.7554/eLife.69244)
Supplement: Supplementary file 5. [file elife-69244-supp5.xlsx]

## Sheet: Sheet1
GPSC	adult	child	total
1	20	332	352
28	40	150	190
20	7	161	168
42	67	56	123
25	7	91	98
9	11	86	97
10	10	85	95
45	13	62	75
66	19	54	73
63	7	65	72
30	16	43	59
74	3	54	57
73	17	37	54
87	9	33	42
82	3	37	40
69	6	33	39
60	11	23	34
100	4	28	32
5	1	29	30
23	2	28	30
16	1	28	29
110	5	24	29
107	5	21	26
118	18	8	26
122	1	24	25
71	0	24	24
127	9	14	23
130	6	17	23
106	0	22	22
128	15	7	22
40	2	18	20
134	6	13	19
149	7	12	19
48	1	17	18
138	2	16	18
153	10	8	18
154	5	13	18
104	0	17	17
151	4	12	16
166	3	13	16
167	1	15	16
173	4	11	15
174	1	14	15
180	1	13	14
187	3	10	13
188	8	5	13
14	0	12	12
32	4	8	12
91	6	6	12
158	6	6	12
172	3	9	12
186	2	10	12
6	2	9	11
165	3	8	11
43	2	8	10
57	2	8	10
123	6	4	10
214	2	8	10
215	2	8	10
34	2	7	9
203	5	4	9
8	5	3	8
26	4	4	8
150	1	7	8
47	0	7	7
51	3	4	7
2	4	2	6
222	1	5	6
263	1	5	6
264	6	0	6
265	1	5	6
12	1	4	5
84	1	4	5
95	4	1	5
137	2	3	5
261	0	5	5
293	3	2	5
294	4	1	5
244	0	4	4
283	0	4	4
287	1	3	4
317	3	1	4
318	1	3	4
319	2	2	4
320	1	3	4
38	0	3	3
49	2	1	3
141	0	3	3
245	0	3	3
248	0	3	3
308	2	1	3
345	2	1	3
346	0	3	3
347	0	3	3
162	0	2	2
177	1	1	2
399	2	0	2
400	1	1	2
401	0	2	2
402	1	1	2
403	1	1	2
404	0	2	2
405	1	1	2
406	2	0	2
18	0	1	1
86	0	1	1
96	0	1	1
147	1	0	1
253	1	0	1
257	0	1	1
275	0	1	1
602	1	0	1
603	0	1	1
604	0	1	1
605	0	1	1
606	0	1	1
607	0	1	1
608	1	0	1
609	1	0	1
610	0	1	1
611	0	1	1
612	0	1	1
613	0	1	1
614	0	1	1
615	0	1	1
617	0	1	1
618	1	0	1
all	508	2129	2637
