# Supplementary material for: Pneumococcal genetic variability in age-dependent bacterial carriage
Source: eLife. 2022 Jul 26;11:e69244. doi: 10.7554/eLife.69244 (PMC9395192; doi:10.7554/eLife.69244)
Supplement: Supplementary file 6. [file elife-69244-supp6.xlsx]

## Sheet: Sheet1
serotype	adult	child	adult_perc	child_perc	total		GPSC	adult	child	adult_perc	child_perc	total
non-typable	79	62	0.560284	0.439716	141		1	10	59	0.144928	0.855072	69
19F	11	70	0.135802	0.864198	81		42	24	14	0.631579	0.368421	38
23F	5	53	0.0862069	0.913793	58		28	19	18	0.513514	0.486486	37
6B	7	36	0.162791	0.837209	43		20	0	33	0	1	33
14	7	22	0.241379	0.758621	29		63	7	14	0.333333	0.666667	21
6A	8	20	0.285714	0.714286	28		73	11	9	0.55	0.45	20
35F	5	16	0.238095	0.761905	21		9	5	13	0.277778	0.722222	18
11A	11	9	0.55	0.45	20		25	2	16	0.111111	0.888889	18
34	4	16	0.2	0.8	20		10	5	12	0.294118	0.705882	17
3	12	7	0.631579	0.368421	19		66	6	10	0.375	0.625	16
6C	7	11	0.388889	0.611111	18		30	7	8	0.466667	0.533333	15
15A	3	12	0.2	0.8	15		45	3	12	0.2	0.8	15
15B	4	11	0.266667	0.733333	15		60	5	8	0.384615	0.615385	13
35C	5	10	0.333333	0.666667	15		87	2	11	0.153846	0.846154	13
10B	7	7	0.5	0.5	14		69	2	10	0.166667	0.833333	12
13	5	9	0.357143	0.642857	14		74	0	11	0	1	11
19A	3	10	0.230769	0.769231	13		110	3	8	0.272727	0.727273	11
33B	3	10	0.230769	0.769231	13		128	9	2	0.818182	0.181818	11
16F	3	8	0.272727	0.727273	11		130	3	7	0.3	0.7	10
19B	4	7	0.363636	0.636364	11		106	0	9	0	1	9
23A	2	9	0.181818	0.818182	11		107	2	6	0.25	0.75	8
4	3	8	0.272727	0.727273	11		154	2	6	0.25	0.75	8
15C	0	8	0	1	8		5	1	6	0.142857	0.857143	7
18C	3	5	0.375	0.625	8		40	1	6	0.142857	0.857143	7
20	3	5	0.375	0.625	8		104	0	7	0	1	7
10A	3	4	0.428571	0.571429	7		118	5	2	0.714286	0.285714	7
17F	2	5	0.285714	0.714286	7		134	3	4	0.428571	0.571429	7
28F	2	5	0.285714	0.714286	7		149	2	5	0.285714	0.714286	7
9V	2	5	0.285714	0.714286	7		151	1	5	0.166667	0.833333	6
21	0	6	0	1	6		172	2	4	0.333333	0.666667	6
5	4	2	0.666667	0.333333	6		8	4	1	0.8	0.2	5
7F	2	4	0.333333	0.666667	6		32	1	4	0.2	0.8	5
31	2	3	0.4	0.6	5		57	2	3	0.4	0.6	5
33C	2	3	0.4	0.6	5		71	0	5	0	1	5
9N	1	4	0.2	0.8	5		100	2	3	0.4	0.6	5
22A	0	4	0	1	4		127	2	3	0.4	0.6	5
23B	1	3	0.25	0.75	4		166	1	4	0.2	0.8	5
48	3	1	0.75	0.25	4		187	1	4	0.2	0.8	5
24F	0	3	0	1	3		203	2	3	0.4	0.6	5
32A	1	2	0.333333	0.666667	3		14	0	4	0	1	4
37	2	1	0.666667	0.333333	3		16	1	3	0.25	0.75	4
40	0	3	0	1	3		23	2	2	0.5	0.5	4
45	0	3	0	1	3		34	1	3	0.25	0.75	4
7B	0	3	0	1	3		43	1	3	0.25	0.75	4
10F	0	2	0	1	2		91	0	4	0	1	4
22F	2	0	1	0	2		122	1	3	0.25	0.75	4
46	2	0	1	0	2		138	0	4	0	1	4
8	1	1	0.5	0.5	2		153	1	3	0.25	0.75	4
1	1	0	1	0	1		158	3	1	0.75	0.25	4
18A	1	0	1	0	1		165	2	2	0.5	0.5	4
24A	0	1	0	1	1		174	1	3	0.25	0.75	4
32F	0	1	0	1	1		317	3	1	0.75	0.25	4
33D	0	1	0	1	1		6	1	2	0.333333	0.666667	3
39	1	0	1	0	1		12	1	2	0.333333	0.666667	3
total	239	511	0.318667	0.681333	750		51	1	2	0.333333	0.666667	3
missing	3	15			18		82	2	1	0.666667	0.333333	3
							141	0	3	0	1	3
							150	0	3	0	1	3
							167	1	2	0.333333	0.666667	3
							186	1	2	0.333333	0.666667	3
							214	1	2	0.333333	0.666667	3
							222	1	2	0.333333	0.666667	3
							345	2	1	0.666667	0.333333	3
							26	2	0	1	0	2
							84	0	2	0	1	2
							123	1	1	0.5	0.5	2
							173	0	2	0	1	2
							188	1	1	0.5	0.5	2
							245	0	2	0	1	2
							248	0	2	0	1	2
							283	0	2	0	1	2
							293	1	1	0.5	0.5	2
							403	1	1	0.5	0.5	2
							2	1	0	1	0	1
							47	0	1	0	1	1
							48	1	0	1	0	1
							49	0	1	0	1	1
							95	1	0	1	0	1
							137	1	0	1	0	1
							147	1	0	1	0	1
							162	0	1	0	1	1
							177	0	1	0	1	1
							180	0	1	0	1	1
							215	1	0	1	0	1
							253	1	0	1	0	1
							261	0	1	0	1	1
							263	1	0	1	0	1
							264	1	0	1	0	1
							294	1	0	1	0	1
							308	1	0	1	0	1
							318	0	1	0	1	1
							319	0	1	0	1	1
							400	1	0	1	0	1
							401	0	1	0	1	1
							402	1	0	1	0	1
							602	1	0	1	0	1
							603	0	1	0	1	1
							604	0	1	0	1	1
							605	0	1	0	1	1
							606	0	1	0	1	1
							609	1	0	1	0	1
							613	0	1	0	1	1
							614	0	1	0	1	1
							total	205	452	0.312024	0.687976	657
							missing	37	74			111
