# Supplementary material for: Pneumococcal genetic variability in age-dependent bacterial carriage
Source: eLife. 2022 Jul 26;11:e69244. doi: 10.7554/eLife.69244 (PMC9395192; doi:10.7554/eLife.69244)
Supplement: Supplementary file 7. [file elife-69244-supp7.xlsx]

## Sheet: Sheet1
serotype	adult	child	adult_perc	child_perc	total		GPSC	adult	child	adult_perc	child_perc	total
non-typable	52	22	0.702703	0.297297	74		42	16	8	0.666667	0.333333	24
19F	9	17	0.346154	0.653846	26		1	8	14	0.363636	0.636364	22
6B	6	16	0.272727	0.727273	22		28	11	4	0.733333	0.266667	15
23F	4	13	0.235294	0.764706	17		73	9	4	0.692308	0.307692	13
3	11	4	0.733333	0.266667	15		10	5	7	0.416667	0.583333	12
14	7	8	0.466667	0.533333	15		9	5	5	0.5	0.5	10
35F	4	11	0.266667	0.733333	15		20	0	9	0	1	9
11A	9	4	0.692308	0.307692	13		30	5	4	0.555556	0.444444	9
6A	6	6	0.5	0.5	12		128	8	1	0.888889	0.111111	9
35C	4	5	0.444444	0.555556	9		60	5	3	0.625	0.375	8
13	5	3	0.625	0.375	8		66	4	4	0.5	0.5	8
34	3	5	0.375	0.625	8		45	1	6	0.142857	0.857143	7
10B	5	3	0.625	0.375	8		63	3	4	0.428571	0.571429	7
19A	3	5	0.375	0.625	8		87	2	5	0.285714	0.714286	7
4	3	4	0.428571	0.571429	7		130	3	4	0.428571	0.571429	7
6C	4	3	0.571429	0.428571	7		74	0	6	0	1	6
5	4	2	0.666667	0.333333	6		149	2	4	0.333333	0.666667	6
17F	2	4	0.333333	0.666667	6		8	4	1	0.8	0.2	5
19B	4	2	0.666667	0.333333	6		25	2	3	0.4	0.6	5
23A	2	4	0.333333	0.666667	6		106	0	5	0	1	5
28F	2	4	0.333333	0.666667	6		110	3	2	0.6	0.4	5
33B	3	3	0.5	0.5	6		118	3	2	0.6	0.4	5
20	2	3	0.4	0.6	5		154	2	3	0.4	0.6	5
15B	4	1	0.8	0.2	5		187	1	4	0.2	0.8	5
18C	3	2	0.6	0.4	5		32	1	3	0.25	0.75	4
7F	2	3	0.4	0.6	5		40	1	3	0.25	0.75	4
16F	3	1	0.75	0.25	4		107	2	2	0.5	0.5	4
33C	2	2	0.5	0.5	4		134	3	1	0.75	0.25	4
31	2	1	0.666667	0.333333	3		51	1	2	0.333333	0.666667	3
37	2	1	0.666667	0.333333	3		57	2	1	0.666667	0.333333	3
48	2	1	0.666667	0.333333	3		69	0	3	0	1	3
15A	1	2	0.333333	0.666667	3		82	2	1	0.666667	0.333333	3
9N	1	2	0.333333	0.666667	3		100	1	2	0.333333	0.666667	3
21	0	2	0	1	2		127	2	1	0.666667	0.333333	3
46	2	0	1	0	2		158	3	0	1	0	3
10A	1	1	0.5	0.5	2		165	2	1	0.666667	0.333333	3
15C	0	2	0	1	2		172	1	2	0.333333	0.666667	3
22A	0	2	0	1	2		186	1	2	0.333333	0.666667	3
22F	2	0	1	0	2		203	1	2	0.333333	0.666667	3
23B	1	1	0.5	0.5	2		317	2	1	0.666667	0.333333	3
24F	0	2	0	1	2		5	1	1	0.5	0.5	2
32A	1	1	0.5	0.5	2		12	1	1	0.5	0.5	2
1	1	0	1	0	1		23	2	0	1	0	2
8	1	0	1	0	1		26	2	0	1	0	2
39	1	0	1	0	1		84	0	2	0	1	2
45	0	1	0	1	1		122	1	1	0.5	0.5	2
10F	0	1	0	1	1		123	1	1	0.5	0.5	2
18A	1	0	1	0	1		138	0	2	0	1	2
24A	0	1	0	1	1		150	0	2	0	1	2
33D	0	1	0	1	1		151	1	1	0.5	0.5	2
9V	1	0	1	0	1		153	1	1	0.5	0.5	2
total	188	182	0.5	0.5	370		174	1	1	0.5	0.5	2
missing	2	8			10		188	1	1	0.5	0.5	2
							214	1	1	0.5	0.5	2
							403	1	1	0.5	0.5	2
							2	1	0	1	0	1
							6	1	0	1	0	1
							16	1	0	1	0	1
							34	1	0	1	0	1
							48	1	0	1	0	1
							71	0	1	0	1	1
							91	0	1	0	1	1
							95	1	0	1	0	1
							104	0	1	0	1	1
							137	1	0	1	0	1
							141	0	1	0	1	1
							147	1	0	1	0	1
							166	1	0	1	0	1
							167	1	0	1	0	1
							177	0	1	0	1	1
							180	0	1	0	1	1
							215	1	0	1	0	1
							222	1	0	1	0	1
							245	0	1	0	1	1
							253	1	0	1	0	1
							263	1	0	1	0	1
							264	1	0	1	0	1
							283	0	1	0	1	1
							293	1	0	1	0	1
							294	1	0	1	0	1
							308	1	0	1	0	1
							318	0	1	0	1	1
							345	1	0	1	0	1
							400	1	0	1	0	1
							402	1	0	1	0	1
							602	1	0	1	0	1
							606	0	1	0	1	1
							609	1	0	1	0	1
							total	164	165	0.5	0.5	329
							missing	26	25			51
